# Supplementary material for: The Effect of the Restrictive Ketogenic Diet on the Body Composition, Haematological and Biochemical Parameters, Oxidative Stress and Advanced Glycation End-Products in Young Wistar Rats with Diet-Induced Obesity
Source: MDPI journal article supplement (doi:10.3390/nu14224805), 2022-11-13

**Figure S1.** The correlation analysis between the analysed parameters in group fed with standard diet at the baseline.

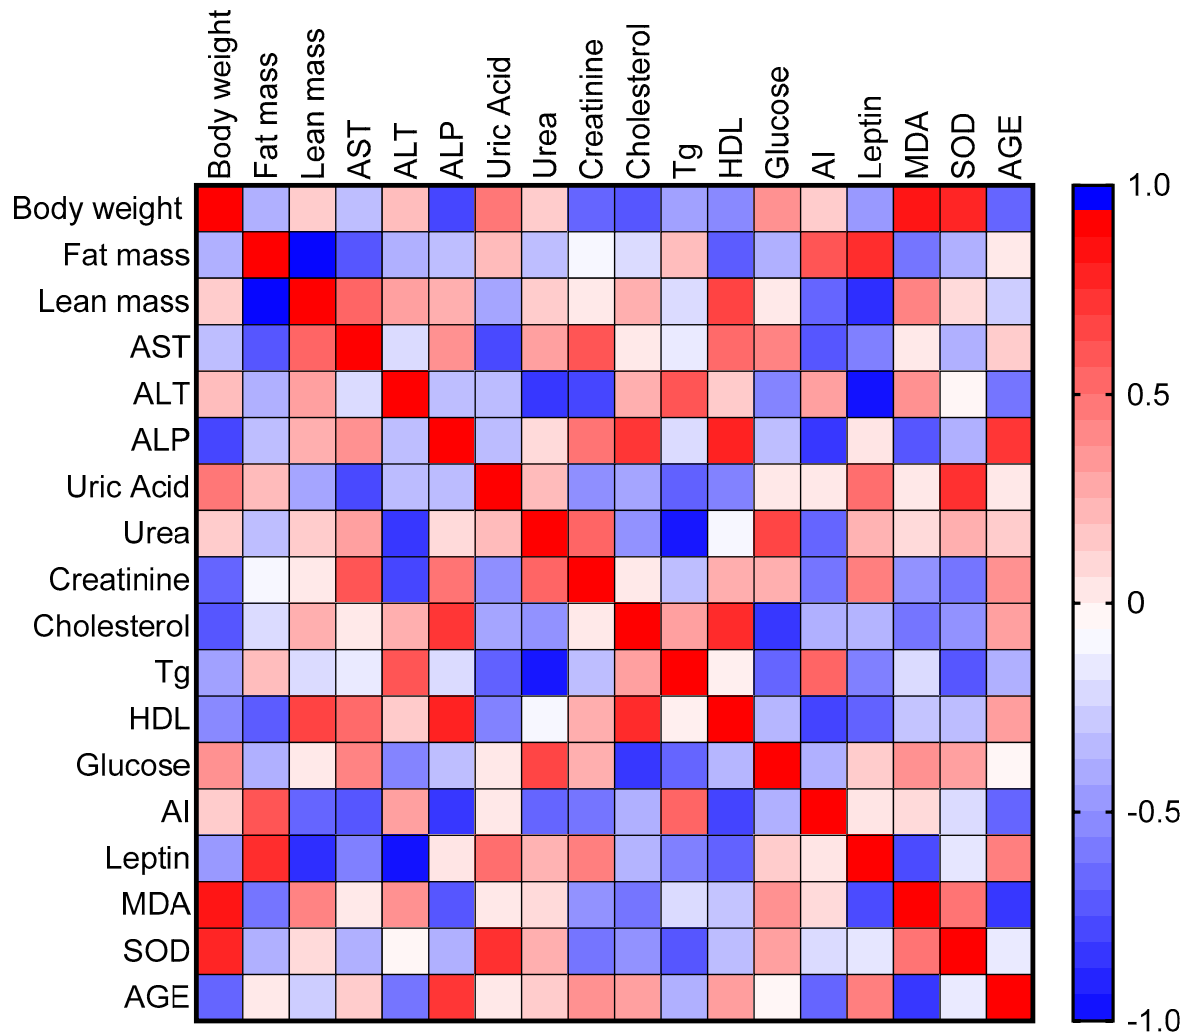

**Figure S2.** The correlation analysis between the analysed parameters in group fed with high-fat diet at the baseline.

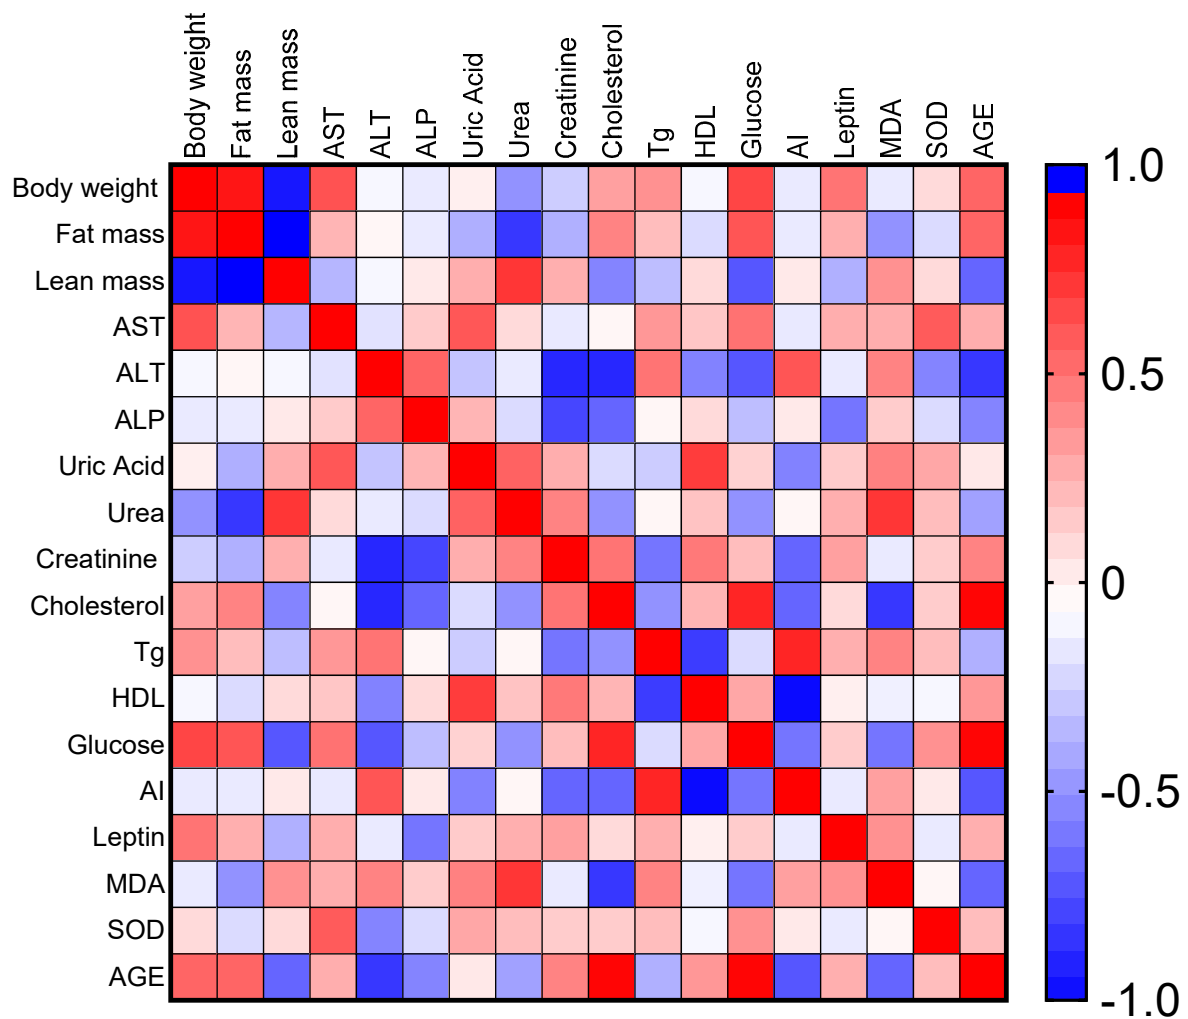

**Figure S3.** The correlation analysis between the analysed parameters in group fed with standard diet at the end of the study.

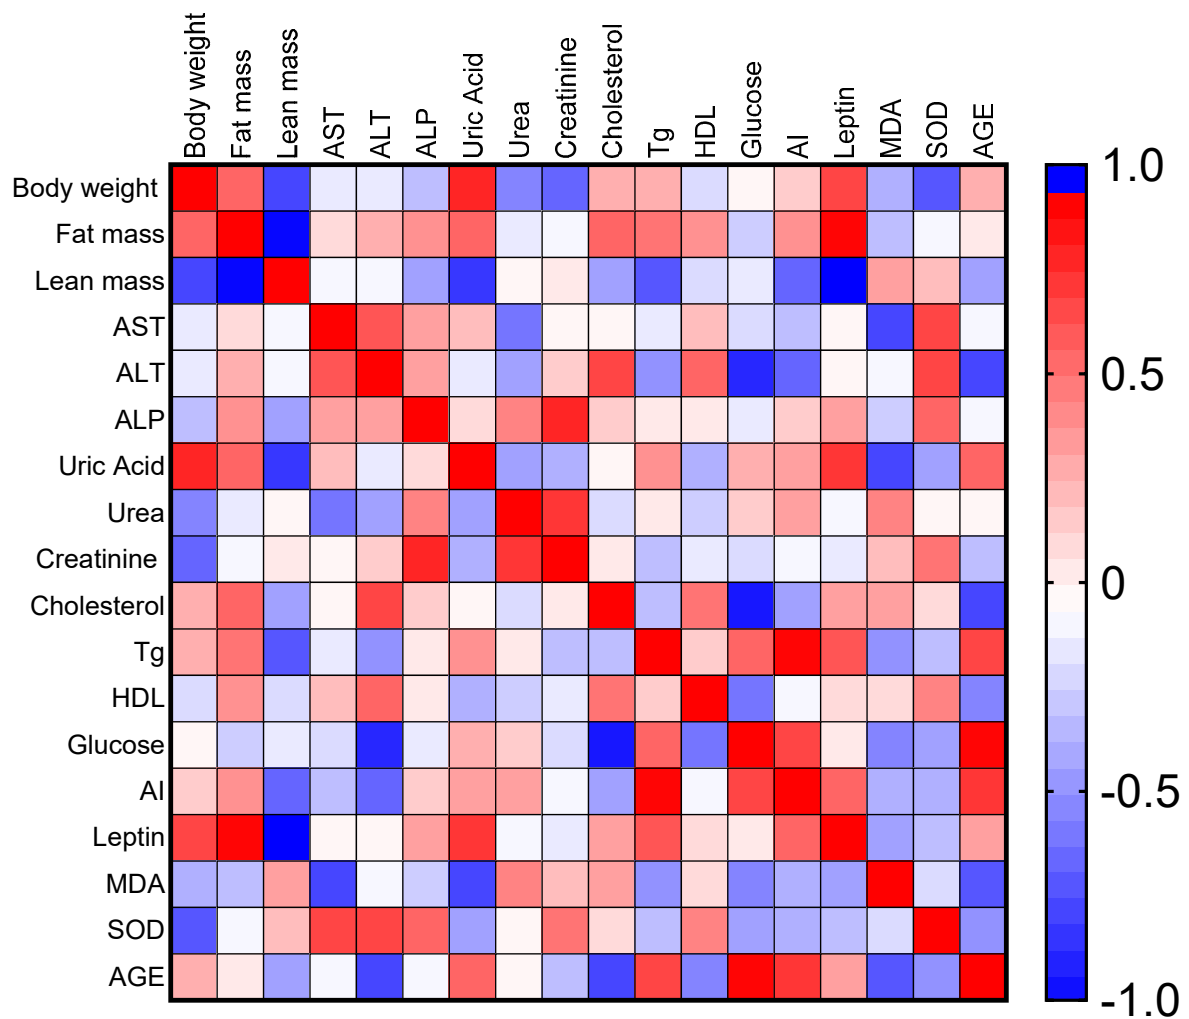

**Figure S4.** The correlation analysis between the analysed parameters in group fed with restrictive ketogenic diet at the end of the study.

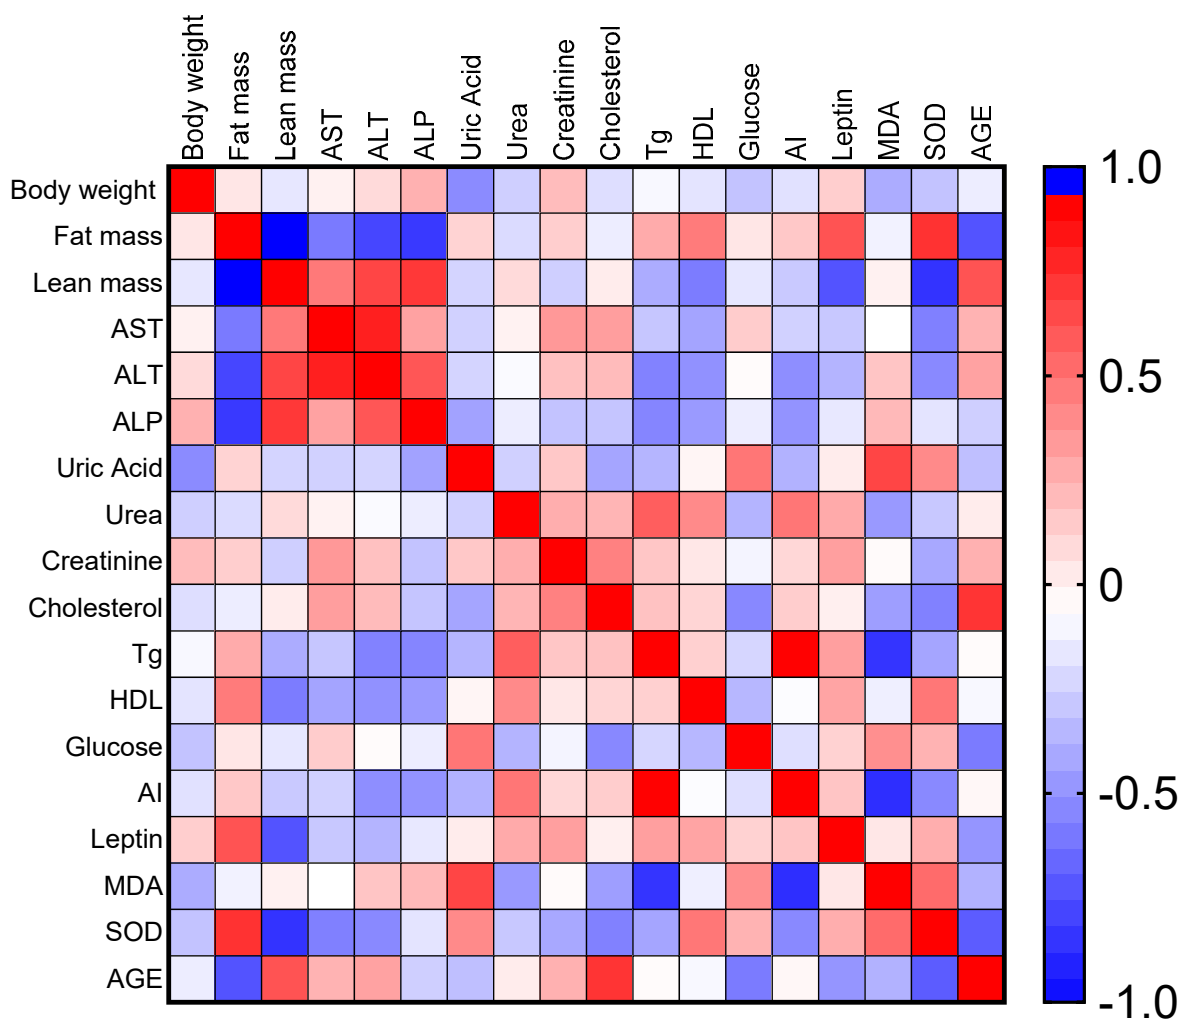

**Figure S5.** The correlation analysis between the analysed parameters in group fed with restrictive standard diet at the end of the study.

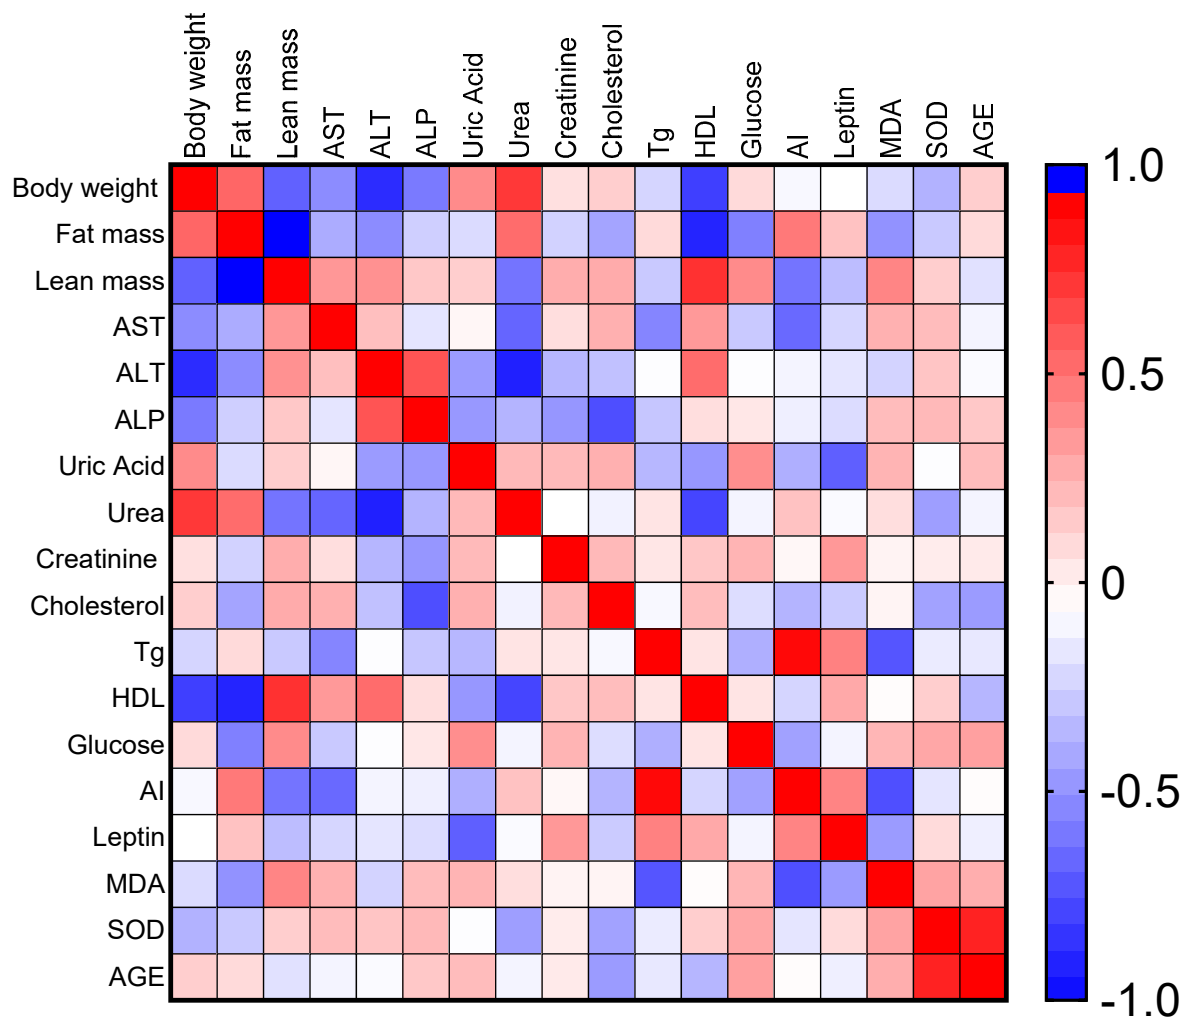

Supplement: s1 [file s1]
